# Supplementary material
Source: MDPI journal article supplement (https://www.mdpi.com/2311-5521/4/1/16)
Supplement: s1 [file s1]

## Sheet: CTM_paper
Patient No.	HR	PEP (ms)	LVET (ms)	EF (%)	AoDP (mmHg)	LVEDP (mmHg)	LVEDP_CTM (mmHg)	age (year)	Gender
1	95	150	190	14	70	25	25.986	51	M
2	95	112	224	44	85	15	16.3951	40	M
3	90	129	220	38	93	25	16.9657	50	M
4	81	126	234	22	62	34	23.5785	58	M
5	86	163	228	13	70	28	26.7196	49	M
6	90	131	203	27	60	21	19.3243	62	M
7	80	135	234	17	70	38	26.1277	47	F
8	65	141	207	23	75	15	21.9293	48	F
9	85	167	189	12	75	32	26.7912	63	M
10	98	136	187	22	85	25	23.1395	59	F
11	78	171	211	8	70	26	29.5376	53	M
12	62	169	240	22	90	30	22.2487	60	M
13	100	134	172	16	85	35	26.5168	61	M
14	95	132	200	21	70	25	23.3204	53	M
15	97	141	197	29	83	10	18.5499	54	M
16	90	138	192	11	90	25	30.2126	33	M
17	105	127	181	28	80	28	19.9571	50	F
19	99	151	202	21	79	24	22.392	29	M
20	55	148	308	54	77	8	8.0497	37	F
22	85	112	248	48	90	24	16.0592	56	F
23	66	136	276	46	70	15	12.297	39	F
24	77	146	236	41	90	11	13.1116	44	M
25	68	99	340	69	62	18	12.0242	43	M
26	90	101	315	84	80	10	6.90997	38	F
27	58	140	323	75	60	10	-1.18845	65	F
28	68	122	268	57	70	5	9.35332	47	M
29	60	140	300	63	70	10	4.19808	43	F
30	59	124	276	47	58	4	12.9017	38	F
31	108	82	219	64	70	3	13.6365	45	F
32	84	163	233	42	82	7	8.87377	50	M
33	84	84	244	56	56	6	15.7723	32	F
34	72	124	239	55	60	8	7.54731	56	M
35	93	109	227	64	60	9	6.21245	20	M
36	83	129	260	48	76	15	12.3266	22	M
38	72	120	284	54	60	8	11.0048	29	F
39	82	110	252	48	65	6	14.5774	52	M
40	92	86	216	70	80	10	11.0866	57	M
41	64	137	261	64	85	5	3.36292	43	M
42	92	108	242	66	58	4	6.34463	29	F
43	60	102	298	60	70	25	13.6429	46	F
45	77	84	266	75	68	5	11.5428	20	F
46	114	115	190	52	70	8	8.8007	63	M
47	74	137	255	45	75	8	12.1204	34	F
48	66	125	283	62	70	13	7.16115	53	F
49	81	129	258	48	70	8	11.7518	42	M
50	60	131	276	49	50	16	10.0844	45	F
51	69	137	243	48	65	13	9.12894	54	M
52	67	137	273	51	70	10	9.46997	46	F
54	92	131	211	31	70	8	18.2189	51	M
55	67	107	225	48	62	15	13.7375	36	M
56	71	117	229	50	75	12	12.0892	40	F
57	83	142	218	33	70	15	15.9108	46	M
58	100	103	198	47	100	8	16.7037	52	F
60	59	121	254	51	85	9	12.8579	41	M
61	74	136	226	41	70	5	12.6424	58	M
62	67	167	272	32	85	13	16.7149	58	F
63	59	112	251	58	62	9	9.60894	47	M
64	71	124	220	39	70	8	15.3816	52	M
65	78	152	245	42	63	8	9.82181	41	F
66	109	93	216	55	60	10	13.2323	28	F
67	80	104	230	62	78	7	9.97526	19	M
68	56	110	298	70	60	12	7.24816	28	M
Mean	79.629	127.242	240.532	44.3871	72.4032	14.5484	14.5484	45.2419	36/26
STD	14.9855	21.5815	37.658	18.4465	10.6409	9.01125	6.87643	11.6009
max	114	171	340	84	100	38	30.2126	65
min	55	82	172	8	50	3	-1.18845	19
